CORRECTION

## Correction: Low-frequency transmission and persistence of antimicrobial-resistant bacteria and genes from livestock to agricultural soil and crops through compost application

Akira Fukuda, Masato Suzuki, Kohei Makita, Masaru Usui

The images for [Figs 1](#) and [2](#) are incorrect, and the image for [Fig 3](#) is missing. The figure captions appear in the correct order. The authors have provided a corrected version of figures here.

### Reference

1. Fukuda A, Suzuki M, Makita K, Usui M. Low-frequency transmission and persistence of antimicrobial-resistant bacteria and genes from livestock to agricultural soil and crops through compost application. PLoS One. 2024;19(5):e0301972. <https://doi.org/10.1371/journal.pone.0301972> PMID: [38771763](https://pubmed.ncbi.nlm.nih.gov/38771763/)

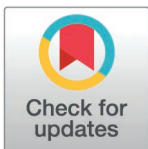

### OPEN ACCESS

**Citation:** Fukuda A, Suzuki M, Makita K, Usui M (2026) Correction: Low-frequency transmission and persistence of antimicrobial-resistant bacteria and genes from livestock to agricultural soil and crops through compost application. PLoS One 21(1): e0341735. <https://doi.org/10.1371/journal.pone.0341735>

**Published:** January 23, 2026

**Copyright:** © 2026 Fukuda et al. This is an open access article distributed under the terms of the [Creative Commons Attribution License](https://creativecommons.org/licenses/by/4.0/), which permits unrestricted use, distribution, and reproduction in any medium, provided the original author and source are credited.

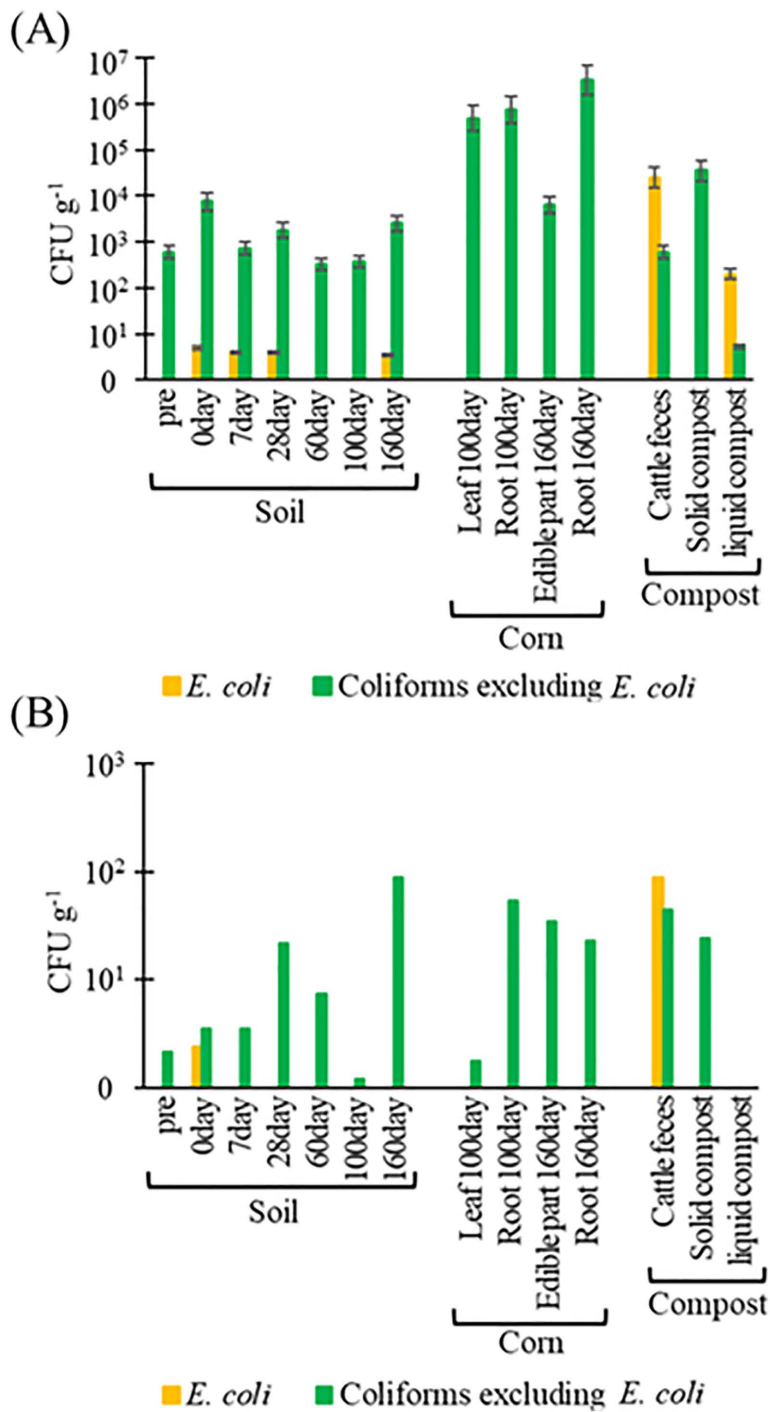

**Fig 1. Abundance of (A) *Escherichia coli* and coliforms (excluding *E. coli*), and (B)  $\beta$ -lactam-resistant *E. coli* and  $\beta$ -lactam-resistant coliforms (excluding *E. coli*) in soil, corn, and compost.** Pre: before the application of composts, day 0: day of application of compost to soils.

<https://doi.org/10.1371/journal.pone.0341735.g001>

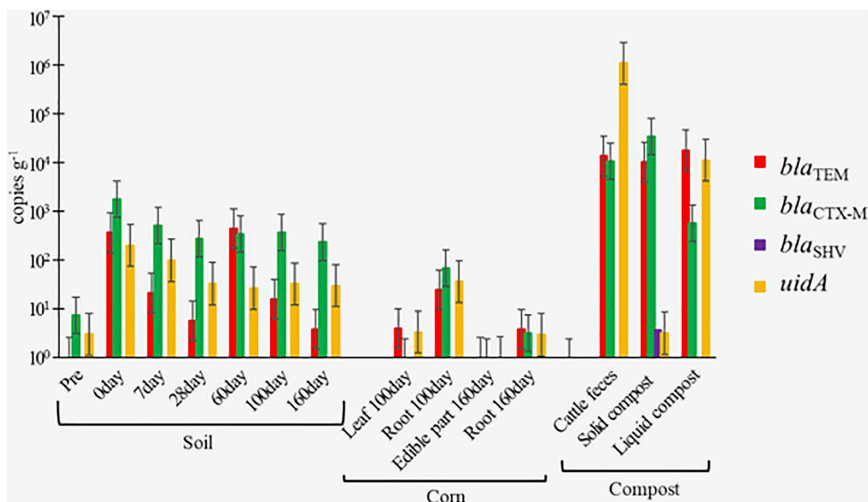

**Fig 2. Quantification of bla and uidA genes in soil, corn, and compost via qPCR.**

<https://doi.org/10.1371/journal.pone.0341735.g002>

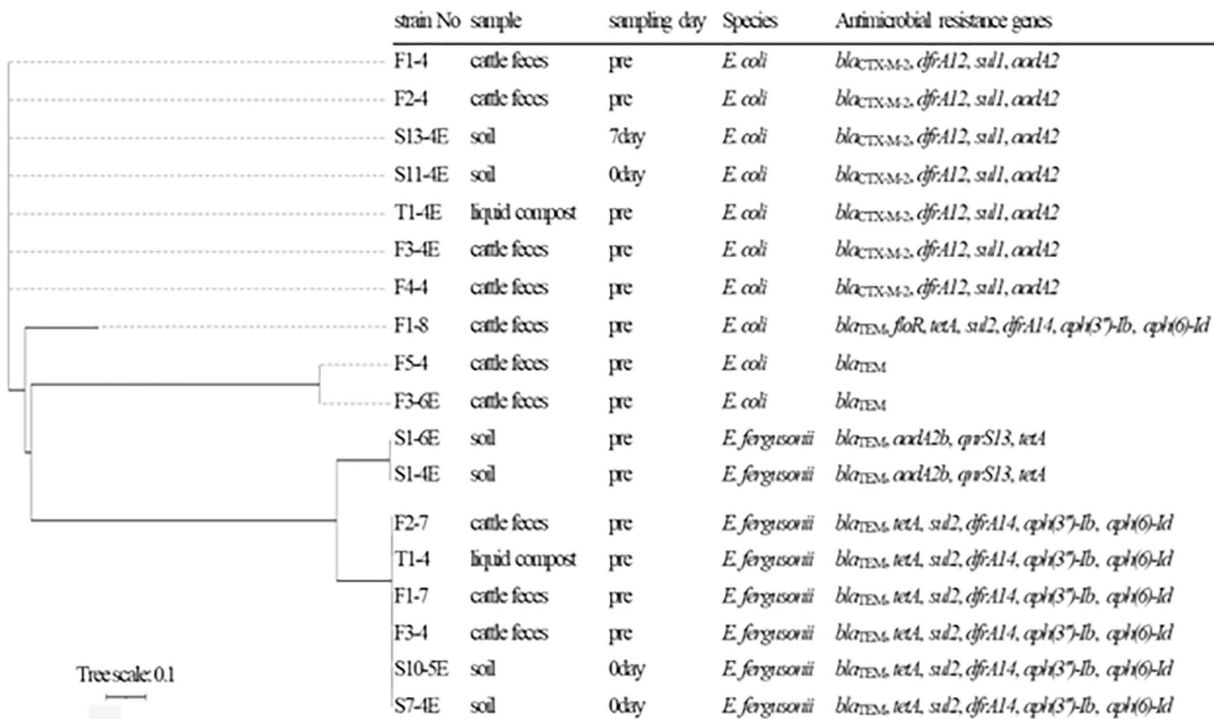

**Fig 3. Phylogenetic tree of bla-positive beta-lactam-resistant Escherichia isolates from soil, cattle feces, and compost.** The phylogenetic tree was inferred from CSI phylogeny using the assembled contigs. The nodes show the strain No/source.

<https://doi.org/10.1371/journal.pone.0341735.g003>
